# Supplementary material
Source: PubMed Central journal article supplement (PMC3421689)

Supplemental TABLE S1. Deoxyribonucleotide primers used for RT-PCR amplification of the different eggplant tRNA ligase cDNAs

| Primer <sup>a</sup> | Sequence (5' to 3') <sup>b</sup>                             | Description                                                      |
|---------------------|--------------------------------------------------------------|------------------------------------------------------------------|
| I                   | CCAGTGAGCAGAGTGACGAGGACTCGAGCTCAAGCTTT<br>TTTTTTTTTTTTTTTTVN | RT poly(A) tail                                                  |
| II                  | ATCACCTTTATGATGGAAAGAGCCG                                    | PCR first cDNA                                                   |
| III                 | GCCGCGCCCTCGAGAAAGAATTCGAGAGTGCCAG                           |                                                                  |
| IV                  | CCAGTGAGCAGAGTGACG                                           | 3' RACE (nested), also with primers I and II                     |
| V                   | AGAGTGAACCTTATTGAACGTTTTTGG                                  |                                                                  |
| VI                  | GAGGACTCGAGCTCAAGC                                           |                                                                  |
| VII                 | CCGGTGGATTTATATCAATGCGG                                      | First 5' circular RACE (nested)                                  |
| VIII                | GTTGCCGCAAAAGATGCCAATACAC                                    |                                                                  |
| IX                  | GTCTGTACAGACTGAGTCCCTCC                                      |                                                                  |
| X                   | CCAATACACTACCACAGTTACTTTCC                                   |                                                                  |
| XI                  | CCCTCCTCGATAATAGACCTCACAG                                    |                                                                  |
| XII                 | GGCGCGGCGCTAGCATGCCAAACAATCAGAGAAAG                          |                                                                  |
| XIII                | TCCTGGAAAAAACGATGAGACCC                                      |                                                                  |
| XIV                 | TGGAAATATTAGGGCTTGAAGGAGC                                    |                                                                  |
| XV                  | GGTGCTAATCCAACGCTGCCAAAC                                     |                                                                  |
| XVI                 | TATTACTGAAAGTGGTGCACAGTC                                     | Second 5' circular RACE (nested) for the genuine 5' end          |
| XVII                | GGCCTCACTTGCCATTTTTTTCCTTC                                   |                                                                  |
| XVIII               | GTGGTGCACAGTCTAGTGTTCCAG                                     |                                                                  |
| XIX                 | CCACCCCTTTCTCTGATTGTTTTGG                                    |                                                                  |
| XX                  | CACTCAGAACCCATGTAGGGTTCAC                                    |                                                                  |
| XXI                 | CCTTTTGTGTAGAAGTGAATGTCGG                                    | RT-PCR (nested) full-length open reading frame                   |
| XXII                | GAGGAATTACAAGTAGAGTTCAAAAG                                   |                                                                  |
| XXIII               | GGCGCGGCCCATGGATGTCGGTTTTCGCATAG                             |                                                                  |
| XXIV                | GGCGCGGCGCGGCCGCAAGAATTCGAGAGTG                              |                                                                  |
| XXV                 | ATGTCGGTTTTCGCATAGGGTC                                       |                                                                  |
| XXVI                | GGTATATCTCCTTCTTAAAG                                         |                                                                  |
| XXVII               | CACCACCACCACCACCTGAGATCCGGCTG                                | Deletion C-terminal extra amino acids of recombinant tRNA ligase |
| XXVIII              | AAAGAATTCGAGAGTGCCAG                                         |                                                                  |

<sup>a</sup>Positions of primers I to III, V, VII to XXV and XXVIII in eggplant tRNA ligase cDNA sequence are shown in Supplementary Fig. 1. Primers IV, VI, XXVI and XXVII do not correspond to tRNA ligase cDNA. Primers IV and VI are homologous to the 5' sequence extension of primer I. Primers XXVI and XXVII are homologous to different regions of plasmid pET23d(+).

<sup>b</sup>Primers XII, XIII, XIV and XIX contain some point mutations respect to the eggplant tRNA ligase cDNA sequence finally determined.

Supplemental FIG. 1. Nucleotide sequence of the cDNA corresponding to eggplant tRNA ligase mRNA (JX025157). The 5' and 3' untranslated regions are in blue, the coding region in black, the sequence corresponding to the predicted (ChloroP) transit peptide on green background and the fragment used for virus-induced gene silencing of *N. benthamiana* tRNA ligase underlined. The positions of primers I to III, V, VII to XXV and XXVIII used in the different RT-PCR amplifications are indicated by arrows under the sequence. Asterisks in some of the primers indicate 5' extensions not corresponding to the tRNA ligase sequence.

```

GTGACTGGCTCAAAGGCGGTAGTAGTGGCTCTTCTTCCCCGCTGGAATTTCTCGCCTATTTTATATTGATTGACAGCAGCCGAGTCTTCCTTTTGTGTAGAACTGAATGTCGGTTTTCGCATAGGGTCATT
/-----> XXI
*-----> XXIII
XXV /----->

TACTCTTTCACCTCATTACAACTCTATAACTCTCTCTTCTTCTTTATCATCTTTGCCTTCTAGAATCTTCTTCCCTTTTCAATCTCCTTCTTTCACACGTTCTCTTCACTCATGCCCAACAATCAGGAAA
XII *-----
XIX <-----

GGGGTGGTTATGAAGGAAAAAATGGCAAGTGAGGCCAAGTTCCAATAGGGTACCAGGCTCGTCTTCAAATGTGGAACCTGTATCTGCTGCAACTGCTGAAGCCATTACCGACCGTCTAAAGTCCGTGGA
> XVII <-----/
-----/

TATTACTGAAAGTGGTGCACAGTCTAGTGTCCAGTCACATCTCTTTCAGTTTGGCAGCGTTGGATTAGCACCCAGTCACCTGTGCAACATCAAAAAGTAATCTGGAAACCCAAATCATATGGAACAGTG
/-----> XVI XV <-----/
/-----> XVIII

TCTGGAGCCCAGTGGTTGAAGCTGGAAAAACACCAGTTGAACAAAAAGTGCTCTTTTAAAGTAAATTTATCAAGGGTAATTTATTGGAAAAATTTACTGTAGATAACTCAACATTTCTCGAGAGCCCAAG
TAAGGGCCACTTTCTACCCAAAATTTGAGAATGAGAAATCAGATCAGGAGATCAGGACAAGGATGATAGAGATGGTCTCCAAAGGCTTGGCTATAGTCGAGGTCACACTTAAGCATTTCTGGATCTCTTTT
TATGTATGCTGGGCATGAAGGTGGAGCATATGCCAAGAAATAGCTTCGGGAATATCTATACTGCCGTTGGCGTCTTTGTCTTGGACGGATGTTTCGTGAGGCATGGGGAACTAAAGCAAGCAAGAAGCAA
GCAGAGTTCAATGAGTTTCTTGAGCGCAATCGTATGTGCATATCAATGGAGTTGGTTCACGGCAGTGTGGGGGACCACGGACAACGCCACGAGATGATTATGCCGTTGTGACTGCAGTCACGGAGTTGG
GAAATGGAAAACCAACTTTCATTTCAACTCCCGATGTAATTGCTTTTTTGCAGGGAAATGGCGATTACCAACAAATCATGTATGGCTGTTCTCAACAAGGAAATCAGTGACTTCCTTCTTTGCTGCGTATGA
TGCACTTTGCAGGAAAGGTACAGCAACCACCGTTTGCAGGCTCTCAGCGAAGTTGCTGATATTTCTGTACCTGGATCAAAAAGCCATATAAAAAGTGCAGGGTGAAATTTTGGAGGGTCTCGTGGCCCCG
ATCGTAAAACGTGAGAGCTCAGAGCATATGGAGCGGGTTCGAGAGATTTTCCCTCCCTCCGCCATCAGAGGGTGAGGGTTTGGACCTGGGACCTACGTTACGTGAAATTTGTGCTGCAAAACAGATCAGAAA
AGCAGCAAATAAAGGCAC'TTCTCAGAGTGTGGCAGGGCTTTCTGCCCGAATTTTGGACTGGTTTGGAGATGAAAAC'TCGGTTACATTCAGAAATGCTGATCGATCTGTTGTCTCAAAGTTCTT
ACAATCACATCC'TGCTGATCTTTATACAGGAAAAATACAGGAAATGGTTTCGCTTGATGAGGGAAAAGCGCTTTCCCTGCTGCTTTCAAGTGTCAATATAACTTACATAAAAATTAATGATGTATCGAGTAAC
AACC'TGCC'TTTCAAAATGGT'GATCCATGTATATAGT'GATTCAGGCTTCCGCCGTACCAGAAAAGAGATGAGGCACAAACCAGGACTATGGCTTTGTATCGAGGCTTTTTTGTGACCTGGATTTATTC
AGTCAATGAGAAGAAAAC'TGCTGAAATGGCAGGAAGCAACAATCAAATGGTAAAAATGTGGAAGAGGACAACAGTTTAGCTGATGAAGATGCAAATCTGATGGTCAAGATGAAATTTCTTACTTACAA
GTTGAGAAC'TTTTTT'GATCCGTAATGGCTTTGTGACTCTTTTTCAAAGAAGGAC'TTCTGCGTATAAGTCTTATTTACCTGAGGCAAATGAAAATTTGGAATACTT'CAGCAGCCAAGCAACGAGAACTCAG
AAGATGCTTTGATGAATGGGCAGTATATATACGCAGAAAAATATGGGAACAAACCAATTTGTCATCATCCACATACC'TAAGTGAAGCTGAGCCTTTCC'TTGAACAATATGCAAAGCGTAGTCCACAAAATCATG
CTTTGATAGGATCTGCTGGAAAATTTTGTCAAAGTTGAAGATTTTCATGGCTATTGTTGAAGGAGAAGATGAAGAGGGTGATCTCGAGCCTGCGAAAAGATATGCTCCTTCAAGCCCTAGTATTTCCACCAG
XIV <-----/

```

AGACATGGTGGCAAAGAATGAGGGTCTCATTATTTTCTTTCCAGGAATACCAGGTTGTGCTAAATCTGCACTTTGTAAGGAAATACTGAATGCTCCAGGAGGGCTTGGAGATGATCGACCAGTTAACAGT  
XIII <-----/

TTAATGGGTGATCTTATTTAAAGGTAGATATTGGCAAAAAGTTGCTGATGAACGTCGAAGAAAACCTTACTCGATCATGCTTGGCTGACAAGAAATGCACCAAATGAGGAAAGTATGGAAACAAATGAGAAACA  
TGTGCCTAAGCACCGGAGCATCTGCTATTCCAGTTATACCTGATTCAGAAGGAAGTGAACCTAATCCATTCTCTATTGATGCACTTGCAGGTTTTTATATTTCCGAGTACTTCACCGTGTCAATCATCCGGG  
AAATCTTGACAAGTCATCTCCAAATGCTGGATATGTGATGCTTATGTTTTATCACCTTTATGATGGAAAGAGCCGTCAGGAGTTCGAGAGTGAGCTTATTGAACGTTTTGGATCGCTTGTGAGAATTCCT  
/-----> II \*-----> V

GTACTGAAACCTGAGAGGTCTCCTCTTCCGGATTCTGTGAGGTCTATTATCGAGGAGGGACTCAGTCTGTACAGACTTCATACAACGAAACATGGAAGATTGGAGTCTACAAAAGGGACATATGTACAAG  
XI <-----/  
IX <-----/

AGTGGGTAAATGGGAGAAGCAATTGAGAGATATCTACTTGGAAATGCAGACTATCTCAATTCAAATACAGGTTCCATTTGAATTTGCCGTTAAAGAAGTCCCTTGAACAACCTGAAAGTTATTGCGAGGGG  
CGAATATGCAGTGCC'TGC'TGAGAAGAGGAAGCTAGGATCCA'TTGTA'TTCGCCGCTATCAGCCTGCCAGTTCAGAAATTCAGGTC'TTCTAAATGATCTAGCAAAGAAAGATCCAAAGGTTGGCGATTTCT  
ATTAAGGACAAGAGCATGGAGAGCAGCATTCAGAAGGCCCATCTTACCC'TGGCTCACAAAGAGAAGTCACGGTGTCACTGCAGTTGCCAATTACGGTTCCTTTCTTCATCAAAAAGGTGCCAGTAGACGTGG  
CTGCTTTGTTGTTCTCCGATAAAATGGCTGCACTAGAAGCTGAGCCTGGCTCTGTTGAAGGTGAAAAGATCAATTCAAAAACTCATGGCCCATATCACATTATGGTCTGGTGCAGGAGTTGCCGCAAA  
/-----

AGATGCCAATACACTACCACAGTTACTTTCCCAAGGGAAGGCTACCCGCATTGATATAAAATCCACCGGTCACTATAACTGGCACTCTCGAATTCCTTTTGAACCTACTTGTAAATTCCTCTTGTGTGGATT  
-----> VIII VII <-----/ III <-----\*  
/-----> X XXII <-----/  
XXIV <-----\*  
XXVIII <-----/

TACATAATGTGAACCCTACATGGGTTCTGAGTGAATCATGTAATGATTCTCCTGAGTTTTAGGAACAATTTGTAGCAGTCTTGCACTTGCAAGGATAGAAGTAGATCTAGAGAAAAATGTAAAGATGTTTA  
XX <-----/

AGGCAATAAAGGTC'TTGAGCTGTGGGCATATTGAAAATCCCCAGTAGCATTTTTCTTGAGCAAAAAAAAAAAAAAAAAA  
I <-----\*

Supplemental FIG. 2. Effect of tRNA ligase silencing on circularization of ELVd and CCCVd monomeric RNAs *in planta*. Dimeric (+) ELVd (A and B) and CCCVd transcripts (C and D) were infiltrated in *N. benthamiana* 16c plants pre-inoculated with a VIGS vector to silence the GFP transgene (A and C) or the endogenous tRNA ligase (B and D). RNAs were purified at 2 (lanes 1 to 3), 3 (lanes 4 to 6), 4 (lanes 7 to 9), 5 (lanes 10 to 12) and 10 (lanes 13 to 15) days from the agroinfiltrated areas of three different plants infected with each VIGS vector. Monomeric circular and linear (+) ELVd (A and B) and CCCVd RNAs (C and D) were revealed by northern blot hybridization. The positions of monomeric circular (mc) and linear (ml) forms of ELVd and CCCVd are indicated on the left of panels. As a loading control, each panel includes a fragment of the corresponding polyacrylamide gel stained with ethidium bromide showing 5S rRNA.

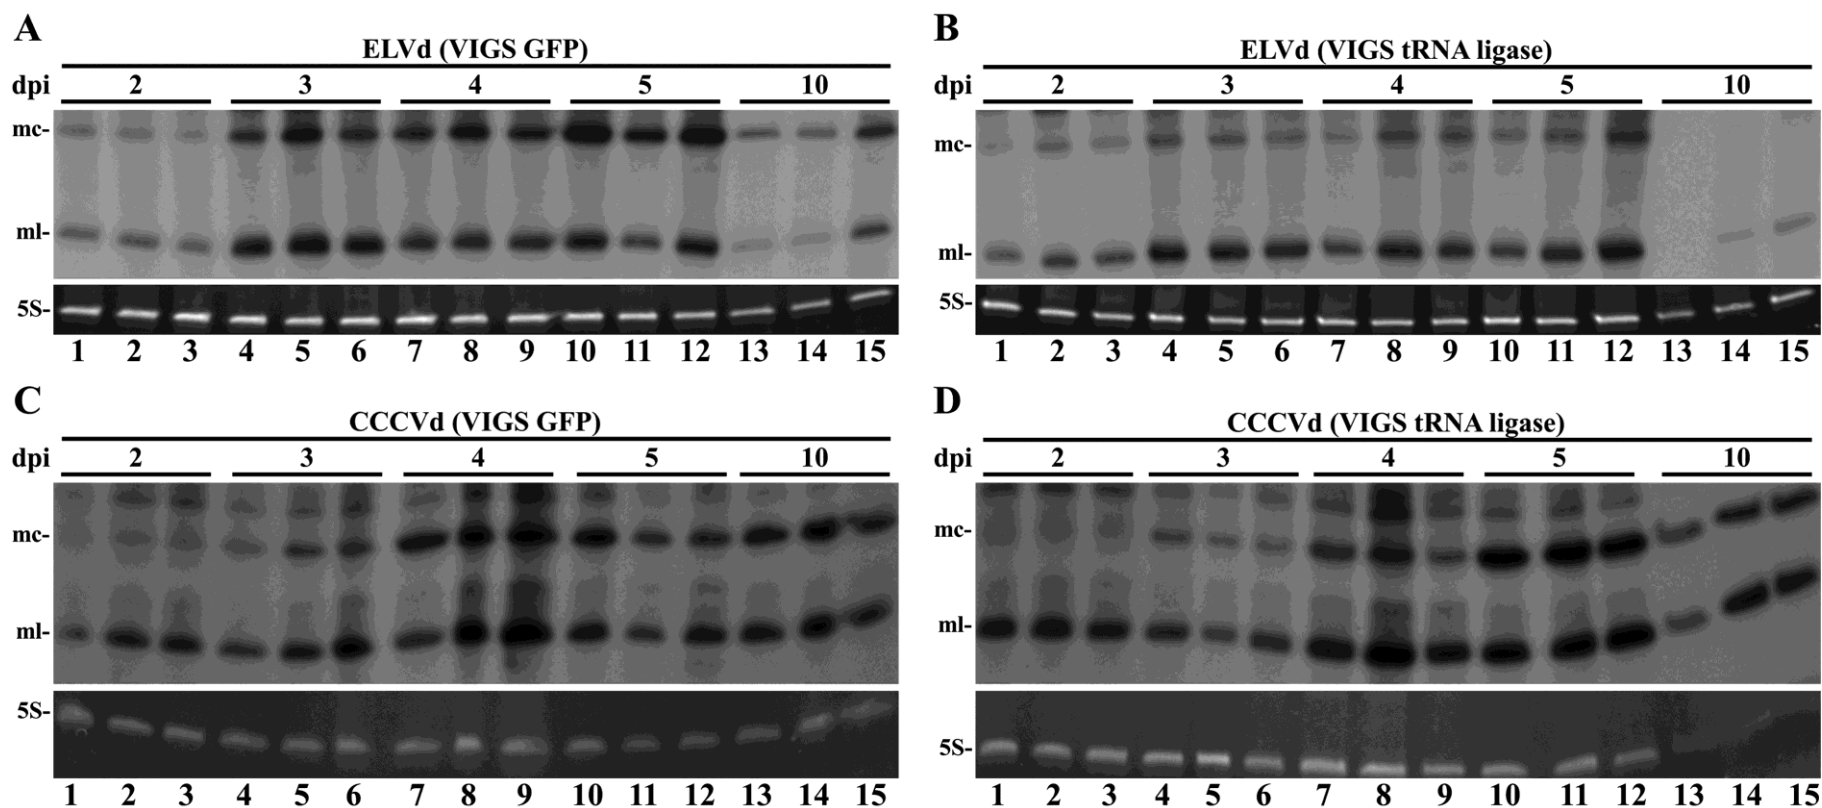

Supplement: JVI.00629-12_zjv999096305so1.pdf [file JVI.00629-12_zjv999096305so1.pdf]
